# Supplementary material
Source: PubMed Central journal article supplement (PMC5369492)
Supplement: flgastro-2015-100651supp_table1.pdf [file flgastro-2015-100651supp_table1.pdf]

### Supplementary Table 1: Bacterial and Fungal Pathogen Designations

This Table lists bacterial and fungal organisms according to their pathogenicity as determined by the Centers for Disease Control and Prevention (CDC).

| <b>Pathogen Designation</b>       |
|-----------------------------------|
| NP = Non-pathogen at any quantity |
| PP = Potential Pathogen           |
| P = Pathogen at any quantity      |

| <b>Bacterial &amp; Fungal Organism</b> | <b>NP</b> | <b>PP</b> | <b>P</b> |
|----------------------------------------|-----------|-----------|----------|
| Acinetobacter calcoaceticus            | <b>X</b>  |           |          |
| Acinetobacter lwoffii                  | <b>X</b>  |           |          |
| Acinetobacter species                  | <b>X</b>  |           |          |
| Aeromonas biovar veronii               |           |           | <b>X</b> |
| Aeromonas hydrophila/caviae            |           |           | <b>X</b> |
| Aeromonas species                      |           |           | <b>X</b> |
| Aeromonas veronii biovar sobria        |           |           | <b>X</b> |
| Agrobacterium radiobacter              | <b>X</b>  |           |          |
| Alcaligenes faecalis                   | <b>X</b>  |           |          |
| Alcaligenes species (faecalis)         | <b>X</b>  |           |          |
| Bacillus anthracis                     |           |           | <b>X</b> |
| Bacillus cereus                        |           | <b>X</b>  |          |

| <b>Bacterial &amp; Fungal Organism</b> | <b>NP</b> | <b>PP</b> | <b>P</b> |
|----------------------------------------|-----------|-----------|----------|
| Bacillus species                       |           | X         |          |
| Bifidobacterium species                | X         |           |          |
| Budvicia aquatica                      | X         |           |          |
| Candida albicans                       |           | X         |          |
| Candida famata                         |           | X         |          |
| Candida glabrata (T. glabrata)         |           | X         |          |
| Candida guilliermondii                 |           | X         |          |
| Candida krusei                         |           | X         |          |
| Candida lambica                        |           | X         |          |
| Candida lusitaniae                     |           | X         |          |
| Candida species,not albicans           |           | X         |          |
| Candida parapsilosis                   |           | X         |          |
| Candida pseudotropicalis               |           | X         |          |
| Candida paratropicalis                 |           | X         |          |
| Candida rugosa                         |           | X         |          |
| Candida species                        |           | X         |          |
| Candida stellatoidea                   |           | X         |          |
| Candida tropicalis                     |           | X         |          |
| Candida zeylanoides                    |           | X         |          |
| Flavimonas oryzihabitans               | X         |           |          |
| Cedecea davisae                        | X         |           |          |

| <b>Bacterial &amp; Fungal Organism</b> | <b>NP</b> | <b>PP</b> | <b>P</b> |
|----------------------------------------|-----------|-----------|----------|
| Citrobacter amalonaticus               |           | X         |          |
| Citrobacter braakii                    |           | X         |          |
| Citrobacter diversus                   |           | X         |          |
| Citrobacter freundii                   |           | X         |          |
| Citrobacter freundii complex           |           | X         |          |
| Citrobacter freundii/youngae           |           | X         |          |
| Citrobacter koseri                     |           | X         |          |
| Citrobacter sedlakii                   | X         |           |          |
| Citrobacter species                    |           | X         |          |
| Cryptococcus albidus                   |           | X         |          |
| Cryptococcus humicolus                 |           | X         |          |
| Cryptococcus laurentii                 |           | X         |          |
| Cryptococcus luteolus                  |           | X         |          |
| Cryptococcus neoformans                |           | X         |          |
| Cryptococcus species                   |           | X         |          |
| Cryptococcus terreus                   |           | X         |          |
| Cryptococcus uniguttulatus             |           | X         |          |
| Edwardsiella tarda                     |           | X         |          |
| Enterobacter aerogenes                 | X         |           |          |
| Enterobacter agglomerans               | X         |           |          |
| Enterobacter amnigenus 1               | X         |           |          |

| <b>Bacterial &amp; Fungal Organism</b> | <b>NP</b> | <b>PP</b> | <b>P</b> |
|----------------------------------------|-----------|-----------|----------|
| Enterobacter amnigenus 2               | <b>X</b>  |           |          |
| Enterobacter amnigenus                 | <b>X</b>  |           |          |
| Enterobacter asburiae                  | <b>X</b>  |           |          |
| Enterobacter cloacae                   |           | <b>X</b>  |          |
| Enterobacter gergoviae                 | <b>X</b>  |           |          |
| gamma haemolytic Streptococcus         | <b>X</b>  |           |          |
| Enterobacter hormaechei                | <b>X</b>  |           |          |
| Enterobacter intermedius               | <b>X</b>  |           |          |
| Enterobacter sakazakii                 | <b>X</b>  |           |          |
| Enterobacter species                   | <b>X</b>  |           |          |
| Enterococcus spp                       | <b>X</b>  |           |          |
| Enterobacter taylorae                  | <b>X</b>  |           |          |
| Escherichia coli A-D                   | <b>X</b>  |           |          |
| Escherichia coli                       | <b>X</b>  |           |          |
| E.coli 0157:H7                         |           |           | <b>X</b> |
| Escherichia fergusonii                 | <b>X</b>  |           |          |
| Haemolytic Escherichia coli            | <b>X</b>  |           |          |
| Escherichia hermannii                  | <b>X</b>  |           |          |
| Escherichia vulneris                   | <b>X</b>  |           |          |
| Flavimonas oryzihabitans               | <b>X</b>  |           |          |
| Flavobacterium indologenes             | <b>X</b>  |           |          |

| <b>Bacterial &amp; Fungal Organism</b>        | <b>NP</b> | <b>PP</b> | <b>P</b> |
|-----------------------------------------------|-----------|-----------|----------|
| Flavobacterium species                        | <b>X</b>  |           |          |
| Blastoschizomyces capitatus/Prototheca zopfii |           | <b>X</b>  |          |
| Geotrichum candidum                           |           | <b>X</b>  |          |
| Geotrichum capitatum                          |           | <b>X</b>  |          |
| Geotrichum species                            |           | <b>X</b>  |          |
| Hafnia alvei                                  |           | <b>X</b>  |          |
| Hansenula anomala                             |           | <b>X</b>  |          |
| Klebsiella ornithinolytica                    | <b>X</b>  |           |          |
| Klebsiella oxytoca                            |           | <b>X</b>  |          |
| Klebsiella ozaenae                            | <b>X</b>  |           |          |
| Klebsiella planticola                         | <b>X</b>  |           |          |
| Klebsiella pneumoniae                         |           | <b>X</b>  |          |
| Klebsiella rhinoscleromatis                   | <b>X</b>  |           |          |
| Klebsiella species                            | <b>X</b>  |           |          |
| Kluyvera ascorbata/cryocrescens               | <b>X</b>  |           |          |
| Kluyvera ascorbata                            | <b>X</b>  |           |          |
| Kluyvera cryocrescens                         | <b>X</b>  |           |          |
| Kluyvera species                              | <b>X</b>  |           |          |
| Lactobacillus species                         | <b>X</b>  |           |          |
| Leclercia adecarboxylata                      | <b>X</b>  |           |          |

| <b>Bacterial &amp; Fungal Organism</b> | <b>NP</b> | <b>PP</b> | <b>P</b> |
|----------------------------------------|-----------|-----------|----------|
| Listeria monocytogenes                 |           |           | <b>X</b> |
| Listeria species                       | <b>X</b>  |           |          |
| Moellerella wisconsensis               |           | <b>X</b>  |          |
| Micrococcus species                    | <b>X</b>  |           |          |
| Morganella morganii                    |           | <b>X</b>  |          |
| Mucoid Escherichia coli                | <b>X</b>  |           |          |
| Presum. Acinetobacter lwoffii          | <b>X</b>  |           |          |
| Photobacterium damsela                 | <b>X</b>  |           |          |
| Pichia ohmeri                          |           | <b>X</b>  |          |
| Plesiomonas shigelloides               |           |           | <b>X</b> |
| Providencia alcalifaciens              |           | <b>X</b>  |          |
| Proteus mirabilis                      |           | <b>X</b>  |          |
| Proteus penneri                        |           | <b>X</b>  |          |
| Providencia rettgeri                   | <b>X</b>  |           |          |
| Providencia stuartii                   | <b>X</b>  |           |          |
| Providencia stuartii urea +            | <b>X</b>  |           |          |
| Proteus vulgaris                       |           | <b>X</b>  |          |
| Prototheca wickerhamii                 | <b>X</b>  |           |          |
| Prototheca zopfii                      | <b>X</b>  |           |          |
| Pseudomonas aeruginosa                 |           | <b>X</b>  |          |
| Pseudomonas cepacia (Burkholderia      | <b>X</b>  |           |          |

| <b>Bacterial &amp; Fungal Organism</b>                              | <b>NP</b> | <b>PP</b> | <b>P</b> |
|---------------------------------------------------------------------|-----------|-----------|----------|
| cepacia)                                                            |           |           |          |
| <i>Pseudomonas fluorescens</i>                                      | <b>X</b>  |           |          |
| <i>Stenotrophomonas maltophilia</i>                                 | <b>X</b>  |           |          |
| <i>Pseudomonas mendocina</i>                                        | <b>X</b>  |           |          |
| <i>Pseudomonas paucimobilis</i>                                     | <b>X</b>  |           |          |
| <i>Pseudomonas pseudomallei</i><br><i>Burkholderia pseudomallei</i> |           |           | <b>X</b> |
| <i>Shewanella putrefaciens</i>                                      | <b>X</b>  |           |          |
| <i>Pseudomonas</i> species                                          | <b>X</b>  |           |          |
| <i>Pseudomonas stutzeri</i>                                         | <b>X</b>  |           |          |
| <i>Pseudomonas vesicularis</i>                                      | <b>X</b>  |           |          |
| <i>Rahnella aquatilis</i>                                           | <b>X</b>  |           |          |
| <i>Rhodotorula glutinis</i>                                         |           | <b>X</b>  |          |
| <i>Rhodotorula rubra</i>                                            |           | <b>X</b>  |          |
| <i>Rhodotorula</i> species                                          |           | <b>X</b>  |          |
| <i>Saccharomyces cerevisiae</i>                                     |           | <b>X</b>  |          |
| <i>Salmonella arizonae</i>                                          |           |           | <b>X</b> |
| <i>Salmonella</i> group D                                           |           |           | <b>X</b> |
| <i>Salmonella</i> group E                                           |           |           | <b>X</b> |
| <i>Salmonella</i> group E+G                                         |           |           | <b>X</b> |
| <i>Salmonella</i> Group C+D                                         |           |           | <b>X</b> |

| <b>Bacterial &amp; Fungal Organism</b> | <b>NP</b> | <b>PP</b> | <b>P</b> |
|----------------------------------------|-----------|-----------|----------|
| Salmonella group A                     |           |           | <b>X</b> |
| Salmonella group B                     |           |           | <b>X</b> |
| Salmonella group C                     |           |           | <b>X</b> |
| Salmonella paratyphi A                 |           |           | <b>X</b> |
| Salmonella paratyphi B                 |           |           | <b>X</b> |
| Salmonella paratyphi C                 |           |           | <b>X</b> |
| Salmonella species                     |           |           | <b>X</b> |
| Salmonella typhi                       |           |           | <b>X</b> |
| Serratia fonticola                     | <b>X</b>  |           |          |
| Serratia liquefaciens                  | <b>X</b>  |           |          |
| Serratia marcescens                    |           | <b>X</b>  |          |
| Serratia odorifera                     | <b>X</b>  |           |          |
| Serratia plymuthica                    | <b>X</b>  |           |          |
| Serratia rubidaea                      | <b>X</b>  |           |          |
| Serratia species                       | <b>X</b>  |           |          |
| Shigella boydii                        |           |           | <b>X</b> |
| Shigella dysenteriae                   |           |           | <b>X</b> |
| Shigella flexneri                      |           |           | <b>X</b> |
| Shigella sonnei                        |           |           | <b>X</b> |
| Shigella species                       |           |           | <b>X</b> |
| Sporobolomyces salmonicolor            | <b>X</b>  |           |          |



| <b>Bacterial &amp; Fungal Organism</b> | <b>NP</b> | <b>PP</b> | <b>P</b> |
|----------------------------------------|-----------|-----------|----------|
| Staphylococcus aureus                  |           | <b>X</b>  |          |
| Coag. negative Staphylococcus          | <b>X</b>  |           |          |
| Streptococcus agalactiae (Group B)     | <b>X</b>  |           |          |
| alpha haemolytic Streptococcus         | <b>X</b>  |           |          |
| gamma Streptococcus                    | <b>X</b>  |           |          |
| beta Strep (Not Group A or B)          | <b>X</b>  |           |          |
| Streptococcus pyogenes (Group A)       | <b>X</b>  |           |          |
| Trichosporon beigeli                   |           | <b>X</b>  |          |
| Blastoschizomyces capitatus            |           | <b>X</b>  |          |
| Trichosporon pullulans                 |           | <b>X</b>  |          |
| Trichosporon species                   |           | <b>X</b>  |          |
| Vibrio cholerae                        |           |           | <b>X</b> |
| Vibrio fluvialis                       |           |           | <b>X</b> |
| Vibrio fumisii                         |           |           | <b>X</b> |
| Vibrio hollisae                        |           |           | <b>X</b> |
| Vibrio metschnikovii                   |           |           | <b>X</b> |
| Vibrio mimicus                         |           |           | <b>X</b> |
| Vibrio parahaemolyticus                |           |           | <b>X</b> |
| Yarrow lipolytica                      | <b>X</b>  |           |          |
| Vibrio species                         |           | <b>X</b>  |          |
| Yeast, not Candida albicans            |           | <b>X</b>  |          |

| <b>Bacterial &amp; Fungal Organism</b> | <b>NP</b> | <b>PP</b> | <b>P</b> |
|----------------------------------------|-----------|-----------|----------|
| Yersinia enterocolitica                |           |           | <b>X</b> |
| Yersinia frederiksenii                 | <b>X</b>  |           |          |
| Yersinia intermedia                    | <b>X</b>  |           |          |
| Yersinia kristensenii                  | <b>X</b>  |           |          |
| Yersinia pseudotuberculosis            |           |           | <b>X</b> |
| Yersinia species                       | <b>X</b>  |           |          |
| Yokenella regensburgei                 | <b>X</b>  |           |          |
