# Supplementary material
Source: PubMed Central journal article supplement (PMC5369492)
Supplement: flgastro-2015-100651supp_table2.pdf [file flgastro-2015-100651supp_table2.pdf]

## Supplementary Table 2: Parasite Pathogen Designations

This Table lists parasitic organisms according to their pathogenicity, as determined by the Centers for Disease Control and Prevention (CDC; <http://www.cdc.gov/immigrantrefugeehealth/pdf/intestinal-parasites-domestic.pdf>)

| <b>Pathogen Designation</b>       |
|-----------------------------------|
| NP = Non-pathogen at any quantity |
| PP = Potential Pathogen           |
| P = Pathogen at any quantity      |

| <b>Parasite Organism</b>  | <b>NP</b> | <b>PP</b> | <b>P</b> |
|---------------------------|-----------|-----------|----------|
| Ancylostoma - Necator sp. |           |           | <b>X</b> |
| Ascaris lumbricoides      |           |           | <b>X</b> |
| Balantidium coli          |           | <b>X</b>  |          |
| Blastocystis hominis      |           | <b>X</b>  |          |
| Charcot-Leyden Crystals   | <b>X</b>  |           |          |
| Chilomastix mesnilli      | <b>X</b>  |           |          |
| Clonorchis sinensis       |           |           | <b>X</b> |
| Cyclospora cayatanensis   |           | <b>X</b>  |          |
| Dientamoeba fragilis      |           |           | <b>X</b> |
| Diphyllobothrium latum    |           | <b>X</b>  |          |

| <b>Parasite Organism</b>           | <b>NP</b> | <b>PP</b> | <b>P</b> |
|------------------------------------|-----------|-----------|----------|
| Echinococcus granulosus            |           |           | <b>X</b> |
| Echinococcus multilocularis        |           |           | <b>X</b> |
| Endolimax nana                     | <b>X</b>  | -         |          |
| Entamoeba coli                     | <b>X</b>  | -         |          |
| Entamoeba dispar                   | <b>X</b>  |           |          |
| Entamoeba hartmani                 |           | <b>X</b>  |          |
| Entamoeba histolytica              |           |           | <b>X</b> |
| Enterobius vermicularis            |           |           | <b>X</b> |
| Enteromonis hominis                | <b>X</b>  |           |          |
| Fasciola hepatica                  |           |           | <b>X</b> |
| Fasciolopsis buski                 |           |           | <b>X</b> |
| Giardia lamblia                    |           |           | <b>X</b> |
| Hymenolepis diminuta               |           |           | <b>X</b> |
| Hymenolepis nana                   |           |           | <b>X</b> |
| Iodamoeba beutschlii               | <b>X</b>  |           |          |
| Isospora belli (Cystoisosporiasis) |           |           | <b>X</b> |
| Metagonimus yokogawai              |           |           | <b>X</b> |
| Necator-Ancylostoma sp.            |           |           | <b>X</b> |
| Paragonimus westermani             |           |           | <b>X</b> |
| Retortamonas hominis               | <b>X</b>  |           |          |
| Schistosoma haematobium            |           |           | <b>X</b> |

| <b>Parasite Organism</b>                       | <b>NP</b> | <b>PP</b> | <b>P</b> |
|------------------------------------------------|-----------|-----------|----------|
| Schistosoma japonicum                          |           |           | <b>X</b> |
| Schistosoma mansoni                            |           |           | <b>X</b> |
| Schistosoma mekongi                            |           |           | <b>X</b> |
| Strongyloides stercoralis                      |           |           | <b>X</b> |
| Taenia sp.                                     |           |           | <b>X</b> |
| Toxocara sp.                                   |           |           | <b>X</b> |
| Trichomonas hominis (Pentatrichomonas hominis) | <b>X</b>  |           |          |
| Trichuris trichiura                            |           |           | <b>X</b> |
